# Supplementary material
Source: publisher figshare collection journal article supplement (https://acs.figshare.com/ndownloader/files/3777493)
Supplement: Supplementary file 1 [file 3777493]

# Supporting Information

## Fabrication of Elemental Copper by Intense Pulsed Light Processing of a Copper Nitrate Hydroxide Ink

*Gabriel L. Draper<sup>1,2</sup>, Ruvini Dharmadasa<sup>2</sup>, Meghan E. Staats<sup>1</sup>, Brandon W. Lavery<sup>1,2</sup>, Thad Druffel<sup>2,\*</sup>*

1- Department of Chemical Engineering, J. B. Speed School of Engineering, University of Louisville, Louisville, KY, 40292

2 – Conn Center for Renewable Energy Research, University of Louisville, Louisville, KY, USA, 40292

### Corresponding Author

\*corresponding author thad.druffel@louisville.edu

KEYWORDS: copper, conductivity, intense pulsed light, nanoparticle synthesis, reduction, copper nitrate hydroxide

## Supporting Information

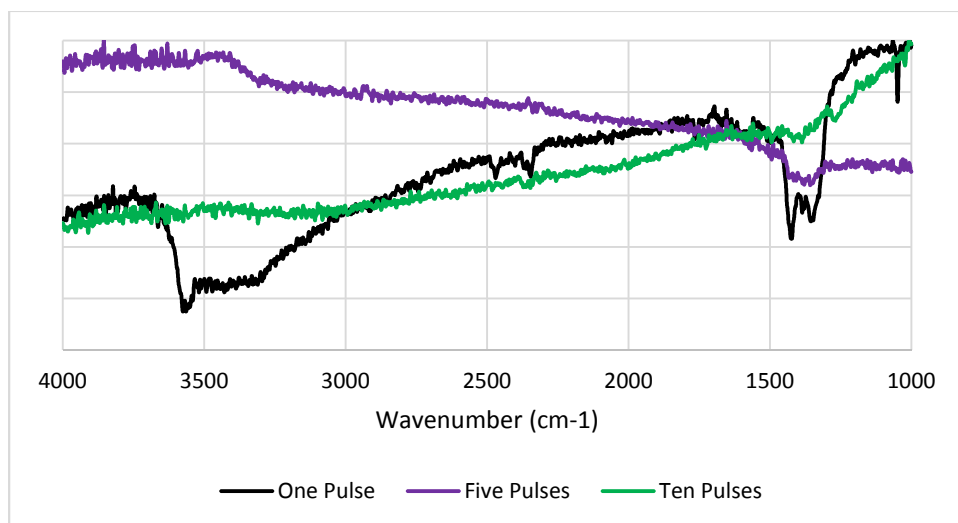

**Figure S1.** FTIR of  $\text{Cu}_2(\text{OH})_3\text{NO}_3$  with one, five, and ten 12.8 Jcm<sup>-2</sup> pulses of IPL processing

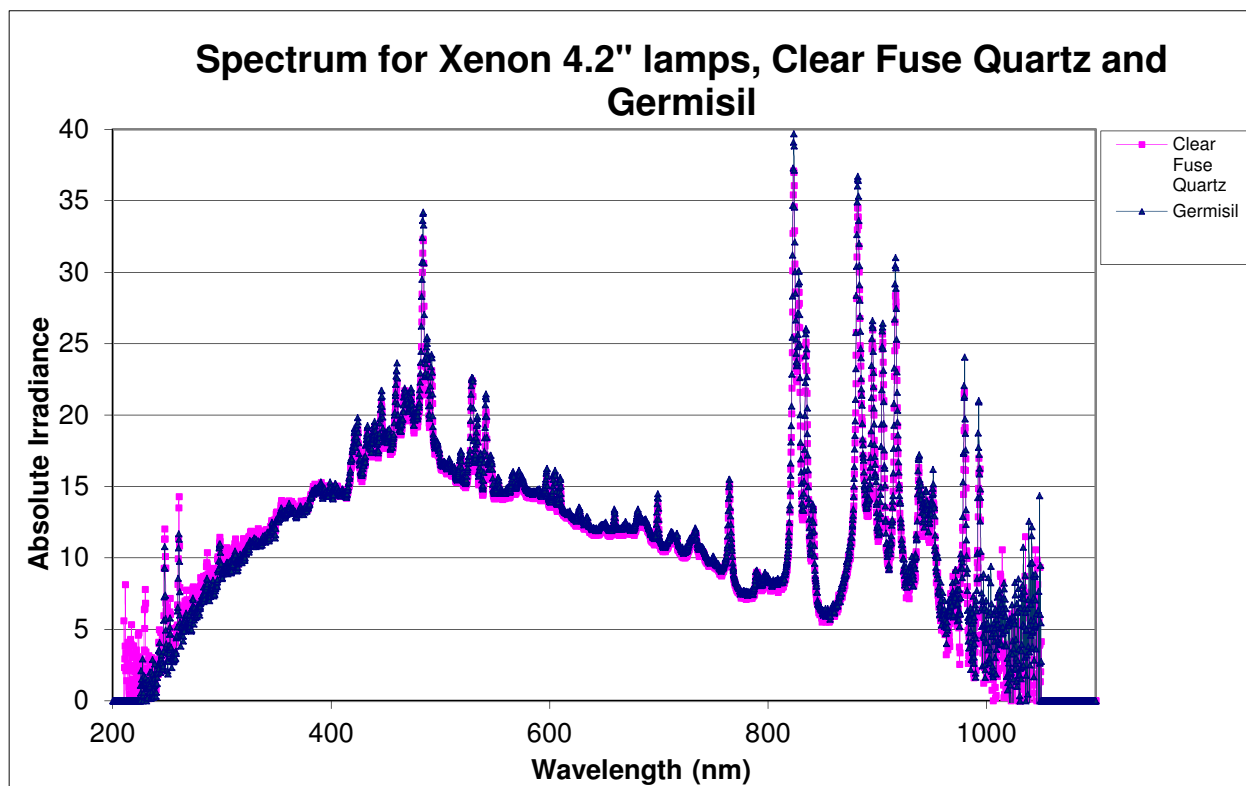

**Figure S2.** Intense Pulsed Light Spectrum

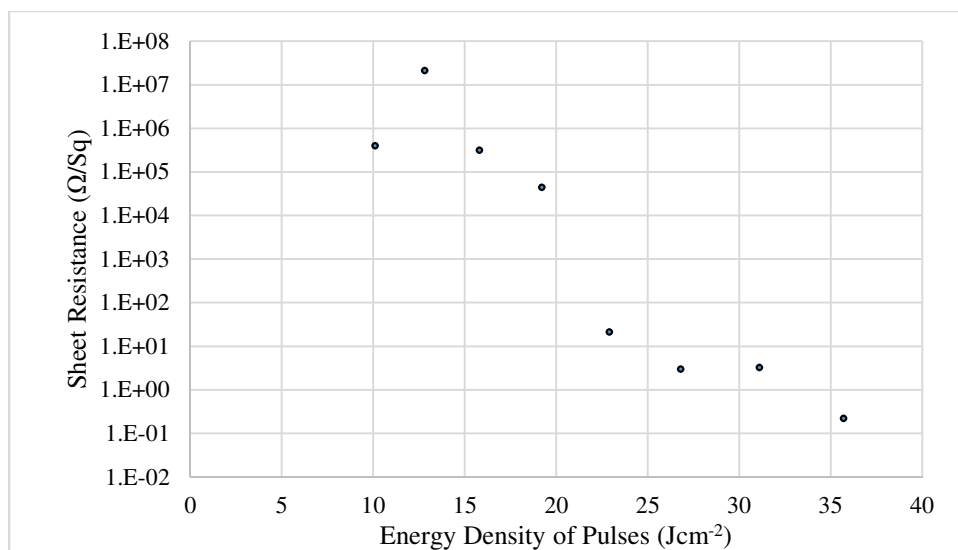

**Figure S3.** Sheet Resistance of IPL processed fructose films with forty pulses at varying energy densities.
